# Supplementary material for: A Targeted Nano Drug Delivery System of AS1411 Functionalized Graphene Oxide Based Composites
Source: PubMed Central journal article supplement — ChemistryOpen. 2021 Feb 19;10(4):408–13. doi: 10.1002/open.202000226 (PMC8015732; doi:10.1002/open.202000226), 2021-02-19
Supplement: OPEN-10-408-s001.pdf [file OPEN-10-408-s001.pdf]

# ChemistryOpen

Supporting Information

## **A Targeted Nano Drug Delivery System of AS1411 Functionalized Graphene Oxide Based Composites**

Baoqing Liu<sup>+</sup>, Wenzhi Yang<sup>+</sup>, Chengchuan Che, Jinfeng Liu, Meiru Si, Zhijin Gong,  
Ruixia Gao, and Ge Yang\*

## Supplementary Contents

|                                                                                                                           |   |
|---------------------------------------------------------------------------------------------------------------------------|---|
| S1. XRD spectra of CO and $\gamma$ -PGA .....                                                                             | 1 |
| S2. FTIR spectra and UV-Vis absorption spectra of DOX, GO-CO- $\gamma$ -PGA-DOX<br>and APT-GO-CO- $\gamma$ -PGA-DOX ..... | 1 |
| S3. The standard curve of DOX concentration-absorbance.....                                                               | 2 |

S1. XRD spectra of CO and  $\gamma$ -PGA

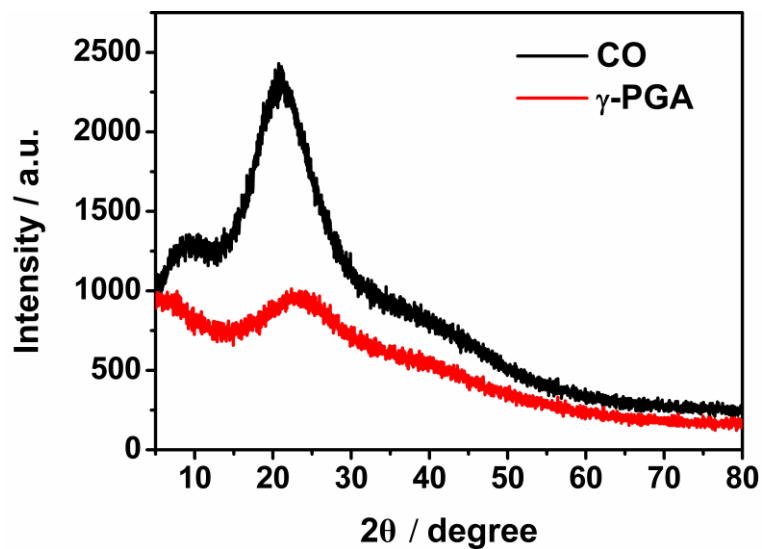

Figure S1. XRD spectra of CO and  $\gamma$ -PGA.

S2. FTIR spectra and UV-Vis absorption spectra of DOX, GO-CO- $\gamma$ -PGA-DOX and APT-GO-CO- $\gamma$ -PGA-DOX

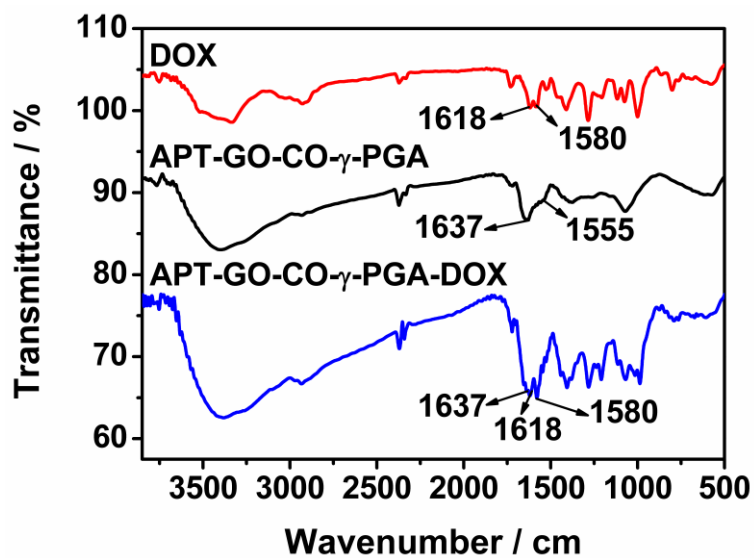

Figure S2. FTIR spectra of DOX, GO-CO- $\gamma$ -PGA-DOX and APT-GO-CO- $\gamma$ -PGA-DOX.

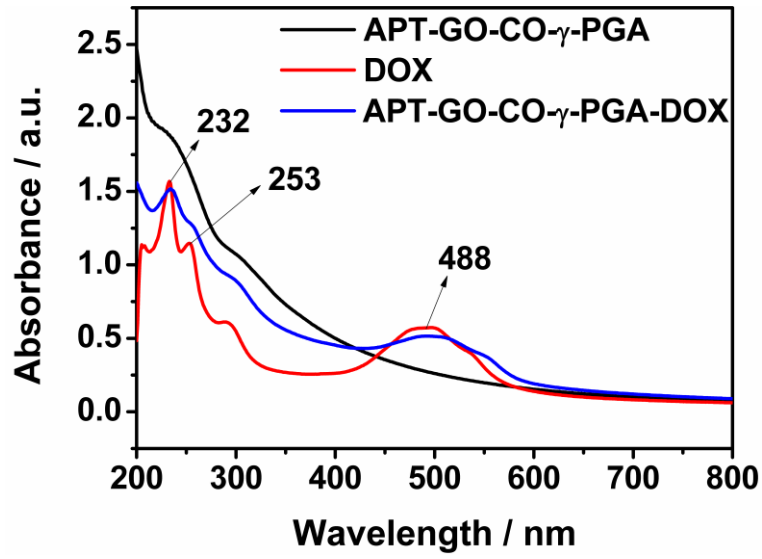

Figure S3. UV-Vis absorption spectra of DOX, GO-CO-γ-PGA-DOX and APT-GO-CO-γ-PGA-DOX.

S3. The standard curve of DOX concentration-absorbance

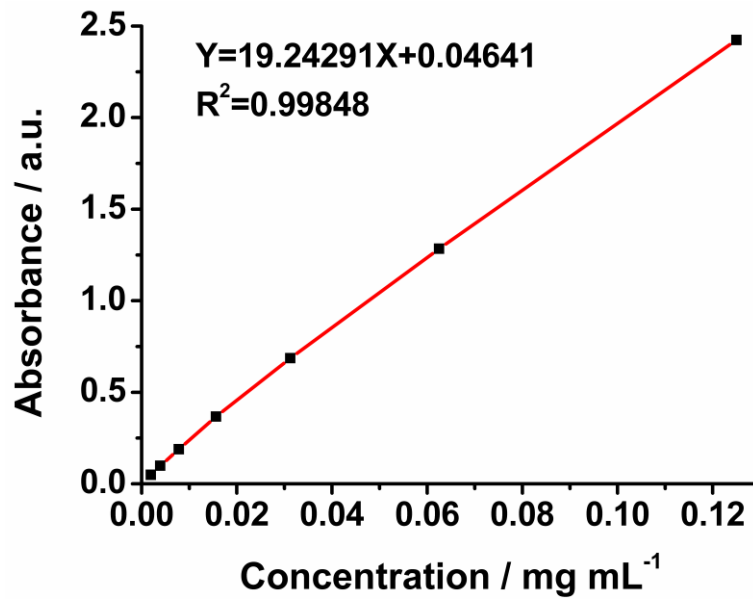

Figure S4. The standard curve of DOX concentration-absorbance.
